# Supplementary material
Source: PubMed Central journal article supplement (PMC3488888)
Supplement: supp_blood-2012-01-405951_blood-2012-01-405951-1.pdf [file supp_blood-2012-01-405951_blood-2012-01-405951-1.pdf]

## Complete List of Antibodies

| <b>Antibody</b>                                     | <b>Company</b>         | <b>Catalog #</b> | <b>Dilution</b> |
|-----------------------------------------------------|------------------------|------------------|-----------------|
| REL-B (C-19)                                        | Santa Cruz Biotech     | Sc-226           | 1 : 200         |
| NIK (Western Blot)                                  | Cell Signaling         | 4994             | 1 : 1000        |
| NIK (IHQ)                                           | abcam                  | 7204-50          | 1 : 100         |
| Phospho-IKK $\alpha$ (Ser 176)/IKK $\beta$ (Ser177) | Cell Signaling         | 2078             | 1:1000          |
| NF-kB2 p100/p52                                     | Cell Signaling         | 4882             | 1:1000          |
| TRAF-2                                              | Cell Signaling         | 4712             | 1 : 1000        |
| TRAF-3 (H-122)                                      | Santa Cruz Biotech     | sc-1828          | 1 : 200         |
| c-IAP-1                                             | BD Pharmingen          | 556533           | 1 : 1000        |
| c-IAP-2                                             | BD Pharmingen          | 51-9000062       | 1 : 1000        |
| Actin (C-11) HRP                                    | Santa Cruz Biotech     | sc-1615 HRP      | 1 : 1000        |
| Peroxidase-conjugated<br>Goat-Anti Rabbit IgG       | Jackson ImmunoResearch | 111-035-003      | 1 : 7000        |

**List of small hairpins sequences used.**

| <b>Oligo Name</b> | <b>Oligo sequence 5' – 3'</b>                                           |
|-------------------|-------------------------------------------------------------------------|
| RELA_bp221 F      | GATCCCGGAGCACAGATACCACCAAGATT <b>CAAGAGAT</b> CTTGGTGGTATCTGTGCTCCTTTT  |
| RELA_bp221 R      | AGCTAAAAAGGAGCACAGATACCACCAAGATCTTGAATCTTGGTGGTATCTGTGCTCCGG            |
| RELA_bp697 F      | GATCCCGGGGATGAGATCTTCTACTGT <b>TTCAAGAGAC</b> AGTAGGAAGATCTCATCCCCTTTT  |
| RELA_bp697 R      | AGCTAAAAAGGGGATGAGATCTTCTACTGTCTTGAACAGTAGGAAGATCTCATCCCCGG             |
| RELB_bp298 F      | GATCCCGACGAGTACATCAAGGAGAACT <b>TTCAAGAGAG</b> TTCTCCTTGATGTACTCGTCTTTT |
| RELB_bp298 R      | AGCTAAAAAGACGAGTACATCAAGGAGAACTCTTGAAGTTCTCCTTGATGTACTCGTCGG            |
| RELB_bp1299 F     | GATCCCGCCATTGCCTTTCACGTACCT <b>TTCAAGAGA</b> AGGTACGTGAAAGGCAATGGCTTTT  |
| RELB_bp1299 R     | AGCTAAAAAGCCATTGCCTTTCACGTACCTTCTTGAAGGTACGTGAAAGGCAATGGCGG             |
| REL_bp1285 F      | GATCCCGATGCAGTTGTGAGAGAAAT <b>GTCAAGAGAC</b> ATTTCTCTCACAACGCATCTTTT    |
| REL_bp1285 R      | AGCTAAAAAGATGCAGTTGTGAGAGAAATGTCTTGAACATTTCTCTCACAACGCATCGG             |
| REL_bp1683 F      | GATCCCGATCCCAACATGCTGTCTAAT <b>TTCAAGAGA</b> AATTAGACAGCATGTTGGGATCTTTT |
| REL_bp1683 R      | AGCTAAAAAGATCCCAACATGCTGTCTAATTTCTTGAATTAGACAGCATGTTGGGATCGG            |
| NIK_bp3658 F      | GATCCCGAAGGCTCCCTGGTAGAATACTT <b>CAAGAGAG</b> TATTCTACCAGGGAGCCTTCTTTT  |
| NIK_bp3658 R      | AGCTAAAAAGAAGGCTCCCTGGTAGAATACTCTTGAAGTATTCTACCAGGGAGCCTTCGG            |
